# Supplementary material
Source: publisher figshare collection journal article supplement (https://gsajournals.figshare.com/ndownloader/files/21743706)
Supplement: Supplementary file 1 [file 21743706]

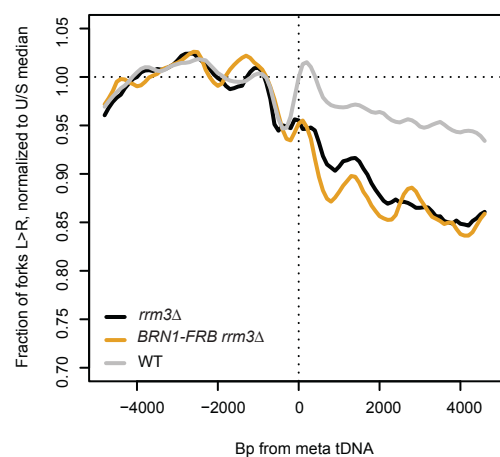

**Figure S2: Loss of tDNA-tDNA interactions via Brn1 depletion has no effect on replisome progression at tDNAs.**

Replisome direction around tDNAs transcribed in either direction, >5kb away from the closest origin, that lost homotypic interchromosomal interactions after Brn1 depletion (n=25) (Paul *et al.*, 2018). WT: Dox-repressible *CDC9* strain congenic with *rrm3Δ*.
